# Supplementary material
Source: publisher figshare collection journal article supplement (https://frontiersin.figshare.com/ndownloader/files/23013398)
Supplement: Supplementary file 1 [file 23013398]

## Sheet: Feuil1
Cruise	Date	Station	depth (m)	Depth	Temperature (°C)	Salinity (psu)	Fluorescence (µg/L)	PAR	turbidity (ntu)	Si(OH)4 (µM)	PO4 (µM)	NO3+NO2 (µM)	NO2 (µM)	NH4 (µM)	PON (µg.L)	POC (µg.L)	Diatoms (cells.L)	Dinoflagelleae (cells.L)	Cryptophyceae (cells.L)	Nanophytoplancton (cells.L)	Total phytoplankton (cells.L)	zeaxanthine (ng.L)	chlorophylle b (ng.L)	Chlorophylle a (ng.L)
2014_September	2014-09-11	Station 1	3	surface	NA	NA	NA	NA	NA	1.44	0.02	0.15	0.02	0.15	NA	NA	654280	38720	80600	44300	817900	5	29	1138
2014_September	2014-09-11	Station 1	6	DCM	16.386	35.337	2.298	128.25	NA	1.52	0.03	0.12	0.01	0.2	NA	NA	511770	41000	169180	46390	768340	7	49	1067
2014_September	2014-09-11	Station 1	25	bottom	15.746	35.366	2.071	7.56	NA	1.82	0.06	0.43	0.06	0.35	NA	NA	522060	69600	211470	39650	842780	6	31	816
2014_September	2014-09-09	Station 2	12	surface	14.525	35.413	1.398	NA	NA	3	0.2	3.25	0.27	0.34	NA	NA	61900	34240	122850	20500	239490	13	100	936
2014_September	2014-09-09	Station 2	60	bottom	14.233	35.42	0.847	0.13	NA	3.35	0.24	4.85	0.31	0.29	NA	NA	37440	13000	54380	18200	123020	12	108	1136
2014_September	2014-09-10	Station 3	10	surface	14.217	35.42	1.247	124.14	NA	3	0.24	3.73	0.28	0.26	NA	NA	66270	16830	44750	754540	882390	8	60	550
2014_September	2014-09-09	Station 3	60	bottom	NA	NA	NA	NA	NA	2.77	0.28	5.14	0.18	0.24	NA	NA	20990	24190	42290	106750	194220	14	113	1015
2014_September	2014-09-10	Station 4	3	surface	14.506	35.431	1.311	230.11	NA	2.57	0.13	2.08	0.13	0.13	NA	NA	52880	34370	205430	135200	427880	52	216	1721
2014_September	2014-09-10	Station 4	8	DCM	14.198	35.447	1.538	184.56	NA	2.61	0.16	2.08	0.13	0.2	NA	NA	124890	187790	346410	736110	1395200	43	217	1566
2014_September	2014-09-10	Station 4	40	bottom	13.134	35.452	0.751	4.96	NA	2.81	0.26	4.81	0.17	0.16	NA	NA	19700	37010	66460	125140	248310	14	76	666
2014_September	2014-09-10	Station 5	3	surface	18.268	35.419	0.641	695.24	NA	0.57	0	0.09	0	NA	NA	NA	200	328560	56390	599510	984660	8	31	245
2014_September	2014-09-10	Station 5	12	DCM	12.301	35.484	0.531	0.35	NA	0.62	0.01	0.13	0	0.46	NA	NA	160	285610	62100	661260	1009130	NA	NA	NA
2014_September	2014-09-10	Station 5	60	bottom	12.359	35.484	0.487	0.28	NA	3	0.37	6.41	0.08	0.31	NA	NA	2640	22260	36250	54540	115690	57	28	0
2015_March	2015-03-10	Station 1	5	surface	10.206	34.686	0.746	67.91	1.374	4.38	0.39	12.13	0.21	0.24	38.8038	220.196	4780	18000	8816	26260	57856	0	49	307
2015_March	2015-03-10	Station 1	20	bottom	10.336	35.071	0.777	0.58	3.866	3.63	0.41	9.46	0.2	0.21	29.5086	215.292	3380	0	4000	2000	9380	0	43	271
2015_March	2015-03-12	Station 2	10	surface	10.511	35.34	0.509	150.19	0.732	2.65	0.34	7.2	0.21	0.1	16.2867	102.252	1800	10000	36250	33790	81840	NA	NA	NA
2015_March	2015-03-12	Station 2	50	bottom	10.499	35.34	0.538	0.44	1.01	2.67	0.35	7.3	0.22	0.09	19.3486	140.499	1720	6120	31220	6000	45060	0	29	269
2015_March	2015-03-10	Station 3	10	surface	10.575	35.361	0.501	40.94	1.73	2.46	0.41	6.91	0.18	0.23	18.6479	146.603	3260	80	14100	10000	27440	0	26	354
2015_March	2015-03-10	Station 3	60	bottom	10.582	35.362	0.493	0	1.836	2.46	0.42	6.79	0.18	0.21	16.0971	75.5025	3264	40	6000	8040	17344	0	30	1291
2015_March	2015-03-11	Station 4	10	surface	10.525	35.362	0.46	112.91	0.855	2.82	0.42	7.17	0.2	0.14	15.2068	187.744	3408	10150	32200	12040	57798	0	35	266
2015_March	2015-03-11	Station 4	60	bottom	10.511	35.362	0.492	0	2.224	2.8	0.35	6.48	0.18	0.18	16.2071	134.195	1600	160	2000	8000	11760	0	30	291
2015_March	2015-03-11	Station 5	10	surface	10.594	35.463	0.587	168.97	0.639	1.82	0.39	5.88	0.18	0.15	15.343	80.7523	10645	4040	20140	8000	42825	0	30	365
2015_March	2015-03-11	Station 5	60	bottom	10.586	35.463	0.631	0.4	0.85	1.86	0.38	5.88	0.25	0.27	13.8284	94.5377	10390	8140	16110	0	34640	0	27	364
2015_July	2015-07-01	Station 1	10	surface	15.66	35.255	1.41	67.56	0.445	0.97	0.05	0	0	0.36	58.4122	314.621	482040	41953	26180	99580	649753	13	108	680
2015_July	2015-07-01	Station 1	30	bottom	14.39	35.298	1.159	3.67	1.809	1.72	0.11	0.52	0.08	0.63	49.5073	247.019	134790	14520	50350	102740	302400	6	101	695
2015_July	2015-07-03	Station 2	5	surface	14.227	35.334	1.906	372.84	0.275	0.53	0.05	0.64	0.08	1.93	38.3151	143.502	349094	175652	58406	207667	790819	NA	NA	NA
2015_July	2015-07-03	Station 2	50	bottom	13.255	35.392	1.026	0.79	0.373	1.1	0.17	2.3	0.16	0.64	77.3668	357.555	76696	9100	10100	135410	231306	NA	NA	NA
2015_July	2015-07-01	Station 3	5	surface	14.777	35.452	0.622	657.67	0.247	0.24	0.06	0.24	0.04	0.23	51.8597	315.359	307965	73340	30250	253330	664885	6	53	872
2015_July	2015-07-01	Station 3	20	DCM	13.641	35.381	1.697	105.38	0.274	0.48	0.11	0.83	0.09	0.5	58.3975	304.652	12400	NA	NA	NA	NA	8	108	1144
2015_July	2015-07-01	Station 3	60	bottom	12.793	35.394	0.575	2.1	0.263	1.02	0.25	2.33	0.2	1.11	27.0776	116.516		12770	12100	52440	89710	0	13	264
2015_July	2015-07-02	Station 4	5	surface	16.927	35.164	1.027	851.28	0.258	0.01	0	0	0.01	0.08	39.0057	262.029	38840	125080	58410	95400	317730	9	64	549
2015_July	2015-07-02	Station 4	20	DCM	13.653	35.393	3.678	77.41	0.26	0.13	0.03	NA	NA	0.08	44.5192	287.722	428050	85830	46370	106040	666290	8	100	1480
2015_July	2015-07-02	Station 4	50	bottom	12.176	35.42	0.307	3.75	0.27	1.27	0.28	3.4	0.25	0.84	21.3499	87.4433	10960	240	2000	4140	17340	0	8	159
2015_July	2015-07-02	Station 5	5	surface	18.198	35.349	0.514	1192.21	0.277	0.02	0.01	0	0.03	0.08	51.5912	331.773	25615	103450	14130	988320	1131515	8	53	778
2015_July	2015-07-02	Station 5	20	DCM	13.53	35.395	2.955	72.37	0.322	1.2	0.23	3.14	0.2	0.25	38.0723	176.521	26170	71888	11190	156804	266052	0	18	722
2015_July	2015-07-02	Station 5	50	bottom	11.713	35.394	0.911	1.26	0.334	1.61	0.3	3.99	0.24	0.38	30.1389	142.941	6730	76566	6040	70880	160216	0	13	499
2015_September	2015-09-08	Station 1	3	surface	15.688	35.332	1.002	378.93	0.298	2.43	0.07	0.01	0.01	0.13	49.8155	283.828	15284	137960	517598	437036	1107878	68	138	465
2015_September	2015-09-08	Station 1	27	bottom	14.971	35.33	0.76	5.87	0.297	2.92	0.25	2.23	0.23	0.51	31.6974	145.531	13280	95200	223778	337887	670145	15	83	314
2015_September	2015-09-10	Station 2	3	surface	15.329	35.379	1.319	81.1	0.317	2.18	0.14	1.02	0.14	0.13	59.5774	284.381	15890	118250	360510	451540	946190	22	165	1272
2015_September	2015-09-10	Station 2	40	bottom	14.766	35.378	0.637	0.27	0.278	2.45	0.25	3.33	0.3	0.46	22.609	106.176	2920	24250	26210	243340	296720	8	65	260
2015_September	2015-09-08	Station 3	3	surface	14.948	35.373	1.094	408.88	0.272	2.4	0.19	2.06	0.22	0.29	43.0443	230.661	334550	64570	35450	298736	733306	20	227	1395
2015_September	2015-09-08	Station 3	15	DCM	14.634	35.369	1.701	151.11	0.282	2.29	0.16	1.96	0.21	0.3	54.6465	371.323	12090	135880	462304	769405	1379679	31	310	2181
2015_September	2015-09-08	Station 3	50	bottom	14.018	35.357	0.945	2.09	0.261	2.42	0.37	4.13	0.29	0.32	26.8457	130.841	13746	10120	82570	178590	285026	7	87	491
2015_September	2015-09-09	Station 4	3	surface	14.774	35.332	2.394	661.63	0.48	1.65	0.09	0.05	0.01	0.22	74.3818	535.401	2670	3909040	624590	2403874	6940454	26	115	1704
2015_September	2015-09-09	Station 4	25	DCM	14.037	35.318	5.36	3.78	0.448	1.75	0.09	0.08	0.01	0.13	115.03	678.366	2950	2562782	772518	1210887	4548857	34	158	5448
2015_September	2015-09-09	Station 4	50	bottom	12.144	35.317	0.308	0.02	0.29	2.54	0.44	5.92	0.09	0.06	10.9538	49.1003	1300	4580	28200	72560	106640	5	37	217
2015_September	2015-09-09	Station 5	3	surface	15.523	35.26	1.754	450.98	0.378	1.07	0.07	NA	NA	0.45	37.489	279.784	8380	1685680	292850	255760	2242670	51	84	1241
2015_September	2015-09-09	Station 5	25	DCM	13.778	35.233	4.512	6.18	0.361	2.63	0.42	5.12	0.13	0.13	14.8229	73.3852	680	198820	104730	129870	434100	14	59	486
2015_September	2015-09-09	Station 5	50	bottom	12.193	35.288	0.294	0.75	0.296	2.87	0.47	6.41	0.12	0.14	15.1612	77.0362	640	6520	34200	2000	43360	8	32	194
